# Supplementary material for: Twenty Element Concentrations in Human Organs Determined by Two-Jet Plasma Atomic Emission Spectrometry
Source: Hindawi journal article supplement (doi:10.1155/2019/9782635), 2019-10-24
Supplement: f1 [file 9782635.f1.pdf]

**Supplementary Table 1.** The content of different elements in lyophilized human spleen preparations ( $\mu\text{g/g}$ )\*.

| Element | Number of spleen preparation |       |       |       |       |       | Average value<br>$\pm$ S.D.<br>(or range) | Median and<br>in parenthesis<br>interquartile<br>range |
|---------|------------------------------|-------|-------|-------|-------|-------|-------------------------------------------|--------------------------------------------------------|
|         | 1                            | 2     | 3     | 4     | 5     | 6     |                                           |                                                        |
| Ag      | <0.02 <sup>Ω</sup>           | <0.02 | <0.02 | <0.02 | <0.02 | <0.02 | <0.02                                     | NP <sup>μ</sup>                                        |
| Al      | 34                           | 35    | 4.9   | 2.4   | 5.9   | 4.9   | 14.5 $\pm$ 15.5**                         | 5.4 (29.1)                                             |
| B       | 1.0                          | 0.79  | 1.0   | <0.6  | <0.6  | <0.6  | (<0.6–1.0)                                | NP                                                     |
| Ba      | <0.3                         | 39*** | <0.3  | <0.3  | <0.3  | <0.3  | <0.3***                                   | NP                                                     |
| Ca      | 560                          | 390   | 480   | 550   | 420   | 670   | 511.7 $\pm$ 103.0                         | 515 (140)                                              |
| Cd      | 0.98                         | 3.0   | 0.11  | 2.2   | 0.1   | 1.5   | 1.3 $\pm$ 1.2                             | 1.24 (2.09)                                            |
| Co      | <0.3                         | <0.3  | <0.3  | <0.3  | <0.3  | <0.3  | <0.3                                      | NP                                                     |
| Cr      | <0.5                         | <0.5  | <0.5  | <0.5  | <0.5  | <0.5  | <0.5                                      | NP                                                     |
| Cu      | 11                           | 8.3   | 7.7   | 9.1   | 7.6   | 20    | 10.6 $\pm$ 4.8                            | 8.7 (3.3)                                              |
| Fe      | 710                          | 880   | 2250  | 3930  | 4150  | 3980  | 2650 $\pm$ 1595                           | 3090 (3100)                                            |
| Mg      | 1150                         | 1400  | 810   | 1180  | 1300  | 1990  | 1305 $\pm$ 391                            | 1240 (250)                                             |
| Mn      | 0.83                         | 0.75  | 0.77  | 1.2   | 1.0   | 3.3   | 1.3 $\pm$ 1.0                             | 0.915 (0.43)                                           |
| Mo      | <0.3                         | <0.3  | 0.3   | 0.87  | 0.63  | 3.7   | (<0.3–3.7)                                | NP                                                     |
| Ni      | <0.5                         | <0.5  | <0.5  | <0.5  | <0.5  | <0.5  | <0.5                                      | NP                                                     |
| Pb      | <0.5                         | <0.5  | <0.5  | 0.61  | <0.5  | 0.66  | (<0.5–0.66)                               | NP                                                     |
| Si      | 360                          | 180   | 77    | 180   | 76    | 110   | 164 $\pm$ 107                             | 145 (103)                                              |
| Sn      | <0.5                         | <0.5  | <0.5  | <0.5  | <0.5  | <0.5  | <0.5                                      | NP                                                     |
| Sr      | 0.43                         | 0.72  | 0.38  | 0.28  | 0.29  | 0.28  | 0.40 $\pm$ 0.17                           | 0.335 (0.15)                                           |
| Ti      | 4.0                          | 18    | <2    | <2    | <2    | <2    | (<2–18)                                   | NP                                                     |
| Zn      | 100                          | 130   | 84    | 100   | 89    | 430   | 156 $\pm$ 135                             | 100 (41)                                               |

\*Element concentrations were determined by two-jet plasma atomic emission spectrometry; the relative standard deviation of the results from three replicates was within 3-12 %.

\*\*In the absence of the Gaussian distribution, in some cases the S.D. values exceeded the average values. Taking this into account for values of Al, median (M) and interquartile ranges (IQR) were also estimated: M = 5.4 , IQR = 29.1

\*\*\*Several sample sets did not fit the Gaussian distribution. Therefore, the analysis results of the sample 2 were not taken into account. For this donor, the barium content in different organs was given separately (Table 2).

<sup>Ω</sup>The data of two-jet plasma atomic emission spectrometry contained reliable peaks corresponding to some elements, but it was possible to estimate only their approximate concentration.

<sup>μ</sup>NP – no possible: it was no possible to calculate Median and interquartile range since of the availability of only approximate data.

**Supplementary Table 2.** The content of different elements in lyophilized human liver preparations ( $\mu\text{g/g}$ )\*.

| Element | Number of liver preparation |       |                    |      |      |       | Average value $\pm$ S.D. (or range) | Median and in parenthesis interquartile range |
|---------|-----------------------------|-------|--------------------|------|------|-------|-------------------------------------|-----------------------------------------------|
|         | 1                           | 2     | 3                  | 4    | 5    | 6     |                                     |                                               |
| Ag      | 0.20                        | 0.05  | <0.02 <sup>Ω</sup> | 0.20 | 0.20 | <0.02 | (<0.02–0.2)                         | NP <sup>‡</sup>                               |
| Al      | 12                          | 12    | 3.9                | 2.1  | 2.1  | 3.3   | 5.9 $\pm$ 4.8                       | 3.6 (9.9)                                     |
| B       | 0.40                        | 0.61  | 1.1                | 0.96 | 0.87 | 0.91  | 0.8 $\pm$ 0.26                      | 0.89 (0.35)                                   |
| Ba      | <0.2                        | 130** | 2.8                | 0.96 | 0.20 | <0.2  | (<0.2–2.8)**                        | NP                                            |
| Ca      | 430                         | 240   | 410                | 310  | 270  | 280   | 323 $\pm$ 78                        | 295 (140)                                     |
| Cd      | 18                          | 25    | 6.3                | 14   | 1.1  | 4.8   | 11.5 $\pm$ 9.1                      | 10.15 (13.2)                                  |
| Co      | 1.0                         | 0.61  | <0.2               | <0.2 | <0.2 | 0.4   | (<0.2–1.0)                          | 0.61 (0.6)                                    |
| Cr      | <0.5                        | <0.5  | <0.5               | <0.5 | <0.5 | <0.5  | <0.5                                | NP                                            |
| Cu      | 12                          | 16    | 19                 | 20   | 28   | 24    | 19.8 $\pm$ 5.7                      | 19.5 (8)                                      |
| Fe      | 280                         | 670   | 310                | 1200 | 1200 | 1400  | 723 $\pm$ 489                       | 935 (890)                                     |
| Mg      | 320                         | 640   | 590                | 390  | 870  | 810   | 603 $\pm$ 220                       | 615 (420)                                     |
| Mn      | 9.1                         | 9.6   | 7.5                | 5.0  | 10   | 10    | 8.5 $\pm$ 2.0                       | 9.35 (2.5)                                    |
| Mo      | 6.6                         | 3.7   | 4.7                | 5.4  | 4.7  | 4.5   | 4.9 $\pm$ 1.0                       | 4.7 (0.9)                                     |
| Ni      | <0.3                        | <0.3  | <0.3               | <0.3 | <0.3 | <0.3  | <0.3                                | NP                                            |
| Pb      | <0.5                        | <0.5  | <0.5               | <0.5 | <0.5 | 0.65  | (<0.5–0.65)                         | NP                                            |
| Si      | 58                          | 22    | 26                 | 93   | 17   | 29    | 40.8 $\pm$ 29.3                     | 27.5 (36)                                     |
| Sn      | 0.78                        | <0.3  | 0.41               | 0.36 | 0.3  | 1.1   | <0.3–1.1)                           | 0.41 (0.42)                                   |
| Sr      | 0.47                        | 1.6   | 0.41               | 0.27 | 0.27 | 0.33  | 0.56 $\pm$ 0.52                     | 0.37 (0.2)                                    |
| Ti      | <2                          | <2    | <2                 | <2   | <2   | <2    | <2                                  | NP                                            |
| Zn      | 140                         | 290   | 170                | 140  | 370  | 520   | 272 $\pm$ 153                       | 230 (230)                                     |

\*Element concentrations were determined by two-jet plasma atomic emission spectrometry; the relative standard deviation of the results from three replicates was within 5-12 %.

\*\*Several sample sets did not fit the Gaussian distribution. Therefore, the analysis results of the sample 2 (Ba) were not taken into account to calculate the average value. For one of the donors (number 2), the barium content in various organs was given separately (Table 2).

<sup>Ω</sup>The data of two-jet plasma atomic emission spectrometry contained reliable peaks corresponding to some elements, but it was possible to estimate only their approximate concentration.

<sup>‡</sup>NP –no possible: it was no possible to calculate Median and interquartile range since of the availability of only approximate data.

**Supplementary Table 3.** The content of different elements in lyophilized human kidney preparations ( $\mu\text{g/g}$ )\*.

| Element | Number of kidney preparation |                    |       |      |       |       | Average value<br>$\pm$ S.D.<br>(or range) | Median and in<br>parenthesis<br>interquartile range |
|---------|------------------------------|--------------------|-------|------|-------|-------|-------------------------------------------|-----------------------------------------------------|
|         | 1                            | 2                  | 3     | 4    | 5     | 6     |                                           |                                                     |
| Ag      | 0.11                         | <0.02 <sup>Ω</sup> | <0.02 | 0.04 | <0.02 | <0.02 | <0.02–0.11)                               | NP <sup>μ</sup>                                     |
| Al      | 7.2                          | 16                 | 5.3   | 4.4  | 5.9   | 5.7   | 7.4 $\pm$ 4.3                             | 5.8 (1.9)                                           |
| B       | 0.80                         | 0.71               | 1.9   | 0.96 | 0.84  | 0.46  | 0.95 $\pm$ 0.50                           | 0.82 (0.25)                                         |
| Ba      | 0.40                         | 3.5**              | 0.35  | 0.40 | 0.2   | 0.40  | (0.2–0.40)**                              | 0.4 (0.05)                                          |
| Ca      | 1950                         | 1310               | 960   | 1330 | 1060  | 780   | 1232 $\pm$ 410                            | 1185 (370)                                          |
| Cd      | 59                           | 250                | 41    | 290  | 9.3   | 37    | 114 $\pm$ 122***                          | 50 (213)                                            |
| Co      | 0.38                         | <0.2               | <0.2  | <0.2 | <0.2  | <0.2  | <0.2–0.38                                 | NP                                                  |
| Cr      | <0.5                         | <0.5               | <0.5  | <0.5 | <0.5  | <0.5  | <0.5                                      | NP                                                  |
| Cu      | 21                           | 15                 | 13    | 19   | 13    | 24    | 17.5 $\pm$ 4.5                            | 17 (8)                                              |
| Fe      | 460                          | 490                | 1180  | 960  | 800   | 1060  | 825 $\pm$ 299                             | 880 (570)                                           |
| Mg      | 1300                         | 1260               | 750   | 1360 | 890   | 1400  | 1160 $\pm$ 271                            | 1280 (470)                                          |
| Mn      | 8.5                          | 7.9                | 7.4   | 10   | 5.5   | 8.1   | 7.9 $\pm$ 1.5                             | 8 (1.1)                                             |
| Mo      | 2.1                          | 1.5                | 1.7   | 3.0  | 1.1   | 1.9   | 1.9 $\pm$ 0.60                            | 1.8 (0.6)                                           |
| Ni      | 2.5                          | 0.34               | 0.33  | 0.83 | 0.36  | 0.53  | 0.82 $\pm$ 0.85***                        | 0.445 (0.49)                                        |
| Pb      | 1.7                          | <0.5               | <0.5  | <0.5 | <0.5  | <0.5  | (<0.5-1.7)                                | NP                                                  |
| Si      | 80                           | 110                | 66    | 83   | 55    | 75    | 78.2 $\pm$ 18.6                           | 77.5 (17)                                           |
| Sn      | <0.5                         | <0.5               | <0.5  | <0.5 | <0.5  | <0.5  | <0.5                                      | NP                                                  |
| Sr      | 1.2                          | 0.48               | 0.42  | 0.62 | 0.45  | 0.5   | 0.6 $\pm$ 0.3                             | 0.49 (0.17)                                         |
| Ti      | 3.7                          | 3.0                | ~2    | ~2   | ~2    | ~2    | (~2 – 3.7)                                | NP                                                  |
| Zn      | 230                          | 420                | 140   | 540  | 170   | 250   | 292 $\pm$ 156                             | 240 (250)                                           |

\*Element concentrations were determined by two-jet plasma atomic emission spectrometry; the relative standard deviation of the results from three replicates was within 3-12 %.

\*\*Several sample sets did not fit the Gaussian distribution. Therefore, the analysis results of the sample 2 (Ba) were not taken into account to calculate the average value. The barium content in various organs of the second donor was given separately (Table 2).

\*\*\*In the absence of the Gaussian distribution, in some cases when the S.D. values exceeded the average ones, the median (M) and interquartile ranges (IQR) were also estimated: Cd: M = 50, IQR = 213 ; Ni: M = 0.44, IQR = 0.49.

<sup>Ω</sup>The data of two-jet plasma atomic emission spectrometry contained reliable peaks corresponding to some elements, but it was possible to estimate only their approximate concentration.

<sup>μ</sup>NP – no possible: it was no possible to calculate Median and interquartile range since of the availability of only approximate data.

**Supplementary Table 4.** The content of different elements in five lyophilized preparations of human muscles ( $\mu\text{g/g}$ )\*.

| Element | Number of muscle preparation |       |       |       |       | Average value<br>$\pm$ S.D.<br>(or range) | Median and in<br>parenthesis<br>interquartile range |
|---------|------------------------------|-------|-------|-------|-------|-------------------------------------------|-----------------------------------------------------|
|         | 1                            | 2     | 3     | 4     | 5     |                                           |                                                     |
| Ag      | <0.03 <sup>Ω</sup>           | 0.05  | <0.03 | <0.03 | <0.03 | (<0.03–0.05)                              | NP <sup>μ</sup>                                     |
| Al      | 2.5                          | 5.2   | 0.81  | 1.1   | 1.5   | 2.2 $\pm$ 1.8                             | 1.5 (1.4)                                           |
| B       | 0.84                         | 0.50  | 0.50  | 0.61  | 0.30  | 0.6 $\pm$ 0.2                             | 0.5 (0.11)                                          |
| Ba      | <0.3                         | 110** | 0.3   | 0.3   | <0.3  | (< 0.3–0.3)**                             | NP                                                  |
| Ca      | 1220                         | 330   | 200   | 190   | 270   | 442 $\pm$ 439***                          | 270 (130)                                           |
| Cd      | 1.7                          | 2.4   | 0.25  | 0.11  | 0.27  | 0.95 $\pm$ 1.0***                         | 0.27 (1.45)                                         |
| Co      | <0.2                         | <0.2  | <0.2  | <0.2  | <0.2  | <0.2                                      | NP                                                  |
| Cr      | <0.5                         | <0.5  | <0.5  | <0.5  | <0.5  | <0.5                                      | NP                                                  |
| Cu      | 6.1                          | 3.7   | 2.5   | 3.9   | 4.9   | 4.2 $\pm$ 1.4                             | 3.9 (1.2)                                           |
| Fe      | 150                          | 130   | 160   | 160   | 180   | 156 $\pm$ 18                              | 160 (10)                                            |
| Mg      | 1100                         | 1030  | 620   | 890   | 1200  | 968 $\pm$ 225                             | 1030 (210)                                          |
| Mn      | 0.75                         | 0.60  | 0.21  | 0.35  | 0.44  | 0.47 $\pm$ 0.21                           | 0.44 (0.25)                                         |
| Mo      | <0.2                         | <0.2  | <0.2  | <0.2  | <0.2  | <0.2                                      | NP                                                  |
| Ni      | <0.5                         | <0.5  | <0.5  | <0.5  | <0.5  | <0.5                                      | NP                                                  |
| Pb      | <0.3                         | <0.3  | <0.3  | 0.64  | <0.5  | (<0.5–0.64)                               | NP                                                  |
| Si      | 45                           | 28    | 23    | 33    | 29    | 31.6 $\pm$ 8.3                            | 29 (5)                                              |
| Sn      | <0.5                         | <0.5  | <0.5  | <0.5  | <0.5  | <0.5                                      | NP                                                  |
| Sr      | 0.65                         | 0.85  | 0.15  | 0.22  | 0.21  | 0.42 $\pm$ 0.31                           | 0.22 (0.44)                                         |
| Ti      | <2                           | <2    | <2    | <2    | <2    | <2                                        | NP                                                  |
| Zn      | 420                          | 340   | 190   | 180   | 320   | 290 $\pm$ 103                             | 320 (150)                                           |

\*Element concentrations were determined by two-jet plasma atomic emission spectrometry; the relative standard deviation of the results from three replicates was within 3-12 %.

\*\*Several sample sets did not fit the Gaussian distribution. Therefore, the analysis results of the sample 2 were not taken into account to calculate the average value. The barium content in various organs of the second donor was given separately (Table 2).

\*\*\*In the absence of the Gaussian distribution, in some cases when the S.D. values exceeded or comparable with the average ones, the median (M) and interquartile ranges (IQR) were also estimated: Ca: M = 270, IQR = 130 ; Cd: M = 0.3 , IQR = 1.4

<sup>Ω</sup>The data of two-jet plasma atomic emission spectrometry contained reliable peaks corresponding to some elements, but it was possible to estimate only their approximate concentration.

<sup>μ</sup>NP –no possible: it was no possible to calculate Median and interquartile range since of the availability of only approximate data.

**Supplementary Table 5.** The content of different elements in lyophilized human heart preparations ( $\mu\text{g/g}$ )\*.

| Element | Number of heart preparation |                    |       |       |       |       | Average value<br>$\pm$ S.D.<br>(or range) | Median and in<br>parenthesis<br>interquartile<br>range |
|---------|-----------------------------|--------------------|-------|-------|-------|-------|-------------------------------------------|--------------------------------------------------------|
|         | 1                           | 2                  | 3     | 4     | 5     | 6     |                                           |                                                        |
| Ag      | 0.05                        | <0.02 <sup>Ω</sup> | <0.02 | <0.02 | <0.02 | <0.02 | (<0.02–0.05)                              | NP <sup>μ</sup>                                        |
| Al      | 16                          | 8.0                | 4.2   | 12    | 6.3   | 8.4   | 9.2 $\pm$ 4.2                             | 8.2 (5.7)                                              |
| B       | 0.78                        | 0.40               | 0.65  | 0.55  | 0.57  | 0.48  | 0.57 $\pm$ 0.13                           | 0.56 (0.17)                                            |
| Ba      | 0.70                        | 2.0**              | 0.17  | 0.40  | 0.35  | 0.16  | 0.36 $\pm$ 0.22**                         | 0.375 (0.53)                                           |
| Ca      | 780                         | 220                | 130   | 400   | 310   | 640   | 413 $\pm$ 251                             | 355 (420)                                              |
| Cd      | 0.51                        | 0.18               | 0.16  | 0.24  | 0.1   | 0.1   | (0.1–0.51)                                | 0.17 (0.14)                                            |
| Co      | 0.74                        | 0.48               | <0.2  | <0.2  | <0.2  | <0.2  | (<0.2–0.74)                               | NP                                                     |
| Cr      | <0.5                        | <0.5               | <0.5  | <0.5  | <0.5  | <0.5  | <0.5                                      | NP                                                     |
| Cu      | 24                          | 18                 | 5.7   | 15    | 15    | 21    | 16.5 $\pm$ 6.3                            | 16.5 (6)                                               |
| Fe      | 420                         | 260                | 210   | 420   | 420   | 840   | 428 $\pm$ 222                             | 420 (160)                                              |
| Mg      | 1900                        | 1100               | 440   | 1100  | 940   | 1630  | 1185 $\pm$ 517                            | 1100 (690)                                             |
| Mn      | 1.2                         | 0.63               | 0.42  | 0.81  | 1.1   | 1.0   | 0.86 $\pm$ 0.30                           | 0.905 (0.47)                                           |
| Mo      | 0.55                        | 0.25               | <0.2  | <0.2  | 0.25  | 0.32  | (<0.2–0.55)                               | 0.285 (0.185)                                          |
| Ni      | <0.5                        | <0.5               | <0.5  | <0.5  | <0.5  | <0.5  | <0.5                                      | NP                                                     |
| Pb      | <0.5                        | <0.5               | <0.5  | <0.5  | <0.5  | <0.5  | <0.5                                      | NP                                                     |
| Si      | 140                         | 28                 | 55    | 84    | 44    | 48    | 66.5 $\pm$ 40.4                           | 51.5 (40)                                              |
| Sn      | <0.5                        | <0.5               | <0.5  | <0.5  | <0.5  | <0.5  | <0.5                                      | NP                                                     |
| Sr      | 0.37                        | 0.13               | 0.1   | 0.20  | 0.19  | 0.20  | 0.2 $\pm$ 0.09                            | 0.195 (0.07)                                           |
| Ti      | <2                          | <2                 | 2.9   | <2    | <2    | <2    | (<2–2.9)                                  | NP                                                     |
| Zn      | 330                         | 210                | 75    | 290   | 160   | 240   | 218 $\pm$ 92                              | 225 (130)                                              |

\*Element concentrations were determined by two-jet plasma atomic emission spectrometry; the relative standard deviation of the results from three replicates was within 3-12 %.

\*\*Several sample sets did not fit the Gaussian distribution. Therefore, the analysis results of the sample 2 were not taken into account to calculate the average value. The barium content in various organs of the second donor was given separately (Table 2).

<sup>Ω</sup>The data of two-jet plasma atomic emission spectrometry contained reliable peaks corresponding to some elements, but it was possible to estimate only their approximate concentration.

<sup>μ</sup>NP –no possible: it was no possible to calculate Median and interquartile range since of the availability of only approximate data.

**Supplementary Table 6.** The content of different elements in lyophilized preparation of human lungs ( $\mu\text{g/g}$ )\*.

| Element | Number of lung preparation |                    |       |      |       |       | Average value<br>$\pm$ S.D.<br>(or range) | Median and in<br>parenthesis<br>interquartile range |
|---------|----------------------------|--------------------|-------|------|-------|-------|-------------------------------------------|-----------------------------------------------------|
|         | 1                          | 2                  | 3     | 4    | 5     | 6     |                                           |                                                     |
| Ag      | 0.06                       | <0.02 <sup>Ω</sup> | <0.02 | 0.04 | <0.02 | <0.02 | (<0.02–0.06)                              | NP <sup>μ</sup>                                     |
| Al      | 340                        | 230                | 530   | 75   | 290   | 110   | 263 $\pm$ 163                             | 260 (230)                                           |
| B       | 3.0                        | 1.8                | 4.6   | 1.7  | 2.0   | 1.7   | 2.5 $\pm$ 1.2                             | 1.9 (1.3)                                           |
| Ba      | 5.4                        | 5600**             | 21    | 4.8  | 1.5   | 1.9   | 6.9 $\pm$ 8.1***                          | 5.1 (19.1)                                          |
| Ca      | 2700                       | 1800               | 1200  | 1200 | 1600  | 1400  | 1650 $\pm$ 565                            | 1500 (600)                                          |
| Cd      | 1.0                        | 4.3                | 1.9   | 7.0  | 0.11  | 0.1   | (0.1–7.0)                                 | 1.45 (4.19)                                         |
| Co      | 0.92                       | 0.81               | 0.74  | 0.30 | 0.2   | 0.2   | (0.2–0.92)                                | 0.52 (0.61)                                         |
| Cr      | 5.0                        | 5.5                | 4.7   | 2.5  | 3.5   | 2.7   | 4.0 $\pm$ 1.3                             | 4.1 (2.3)                                           |
| Cu      | 19                         | 13                 | 13    | 12   | 13    | 21    | 15.2 $\pm$ 3.8                            | 13 (6)                                              |
| Fe      | 3400                       | 2400               | 2600  | 2900 | 2500  | 3600  | 2900 $\pm$ 498                            | 2750 (900)                                          |
| Mg      | 1150                       | 1300               | 1100  | 930  | 880   | 1200  | 1093 $\pm$ 161                            | 1125 (270)                                          |
| Mn      | 3.5                        | 3.5                | 3.4   | 1.9  | 2.3   | 1.8   | 2.7 $\pm$ 0.82                            | 2.85 (1.6)                                          |
| Mo      | 0.41                       | 0.24               | 0.31  | 0.30 | 0.39  | 0.32  | 0.33 $\pm$ 0.06                           | 0.315 (0.090)                                       |
| Ni      | 6.7                        | 3.1                | 3.5   | 2.5  | 0.85  | 2.0   | 3.1 $\pm$ 2.0                             | 2.8 (1.5)                                           |
| Pb      | 0.41                       | <0.3               | <0.3  | <0.3 | <0.3  | <0.3  | (<0.3–0.41)                               | NP                                                  |
| Si      | 3100                       | 1600               | 5600  | 650  | 2500  | 890   | 2390 $\pm$ 1829                           | 2050 (2210)                                         |
| Sn      | 2.0                        | 2.2                | 6.1   | 3.0  | 5.2   | 0.5   | 3.2 $\pm$ 2.1                             | 2.6 (3.2)                                           |
| Sr      | 2.1                        | 31**               | 1.2   | 0.71 | 0.47  | 0.66  | 1.0 $\pm$ 0.66                            | 0.955 (1.44)                                        |
| Ti      | 42                         | 30                 | 54    | 12   | 37    | 12    | 31 $\pm$ 17                               | 33.5 (30)                                           |
| Zn      | 230                        | 260                | 170   | 180  | 185   | 220   | 208 $\pm$ 35                              | 202.5 (50)                                          |

\*Element concentrations were determined by two-jet plasma atomic emission spectrometry; the relative standard deviation of the results from three replicates was within 3-12 %.

\*\*Several sample sets did not fit the Gaussian distribution. Therefore, the analysis results of the sample 2 (Ba and Sr) were not taken into account to calculate the average value. The barium content in various organs of the second donor was given separately (Table 2).

\*\*\*Even without taking into account the barium content of the second donor, S.D. was larger than the average value; the median (M) and interquartile ranges (IQR) were also estimated: Ba: M = 4.8, IQR = 3.5.

<sup>Ω</sup>The data of two-jet plasma atomic emission spectrometry contained reliable peaks corresponding to some elements, but it was possible to estimate only their approximate concentration.
